# Supplementary material for: Non-linear transduction strategies for chemo/biosensing on small length scales
Source: Royal Society of Chemistry journal article supplement (doi:10.1039/b503026a), 2005-01-01
Supplement: b503026a.pdf [file b503026a.pdf]

Supporting Information for

**Non-linear Transduction Strategies for Chemo-/Bio- Sensing on  
Small Length Scales**

Aetna W. Wun, Preston T. Snee, YinThai Chan, Mounqi G. Bawendi and Daniel G. Nocera \*

*Department of Chemistry, 6-335, Massachusetts Institute of Technology, 77 Massachusetts Avenue,  
Cambridge, MA 02139-4307*

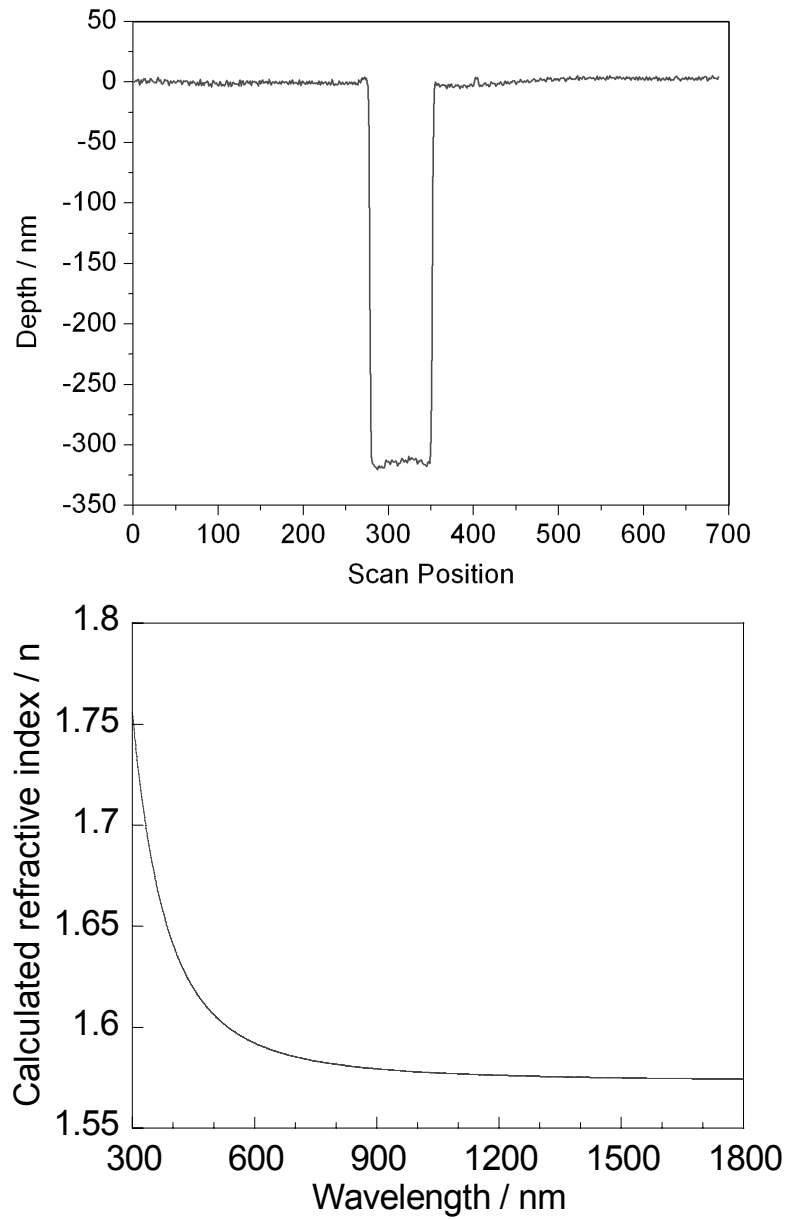

**Figure S1.** (Top) Surface profilometry trace for a thin film sample with thickness,  $d = 318$  nm. (Bottom) Plot of the calculated refractive index ( $n$ ) from spectroscopic ellipsometry measurements of the same film as a function of wavelength. The thickness is calculated to be  $d = 349$  nm.
